# Supplementary material
Source: MDPI journal article supplement (https://www.mdpi.com/2073-4395/14/1/60)
Supplement: s1 [file s1]

# Prediction of Daily Ambient Temperature and Its Hourly Estimation Using Artificial Neural Networks in Urban Allotment Gardens and an Urban Park in Valladolid, Castilla y León, Spain

Francisco Tomatis <sup>1</sup>, Francisco Javier Diez <sup>1</sup>, Maria Sol Wilhelm <sup>2</sup> and Luis Manuel Navas-Gracia <sup>1,\*</sup>

<sup>1</sup> TADRUS Research Group, Department of Agricultural and Forestry Engineering, University of Valladolid, 34004 Palencia, Spain; francisco.tomatis@uva.es (F.T.); x5pino@yahoo.es (F.J.D.)

<sup>2</sup> Centro de Estudios de Variabilidad y Cambio Climático, Facultad de Ingeniería y Ciencias Hídricas, Universidad Nacional del Litoral, Santa Fe 3000, Argentina; msolwilhelm@gmail.com

\* Correspondence: luismanuel.navas@uva.es

## Supplementary Materials.

**Table S1.** Prediction models for average hourly temperatures (°C) in urban gardens and forested urban park in Valladolid (Spain), according to the different ANNs architectures (X-Y-Z)=(6-Y-1), changing the number of neurons in the hidden layers Y=(2, 3,...,8). Where the inputs are X=[Ta(t) Puente Poniente, Ta(t) Plaza San Miguel, Ta(t) Catedral, Ta(t) Don Sancho, Ta(t) Dos de Mayo, Hour of day (t=0, 1,..., 23)], and the output is Z=[Ta(t) Jardín Botánico], Z=[Ta(t) Valle de Arán], Z=[Ta(t) Los Santos-Pilarica], Z=[Ta(t) Parque Alameda], and Z=[Ta(t) Campo Grande] in each case. Adjustment of statistical values..

| Outputs for Jardin Botánico |              |              |               |              |              |              |              |
|-----------------------------|--------------|--------------|---------------|--------------|--------------|--------------|--------------|
| Statistics                  | ANN<br>6-2-1 | ANN<br>6-3-1 | ANN<br>6-4-1  | ANN<br>6-5-1 | ANN<br>6-6-1 | ANN<br>6-7-1 | ANN<br>6-8-1 |
| RMSE (°C)                   | 0.72         | 0.61         | 0.60          | 0.65         | 0.64         | <u>0.60</u>  | 0.61         |
| R <sup>2</sup>              | 0.988        | 0.991        | <u>0.992</u>  | 0.990        | 0.991        | <u>0.992</u> | <u>0.992</u> |
| DW                          | 1.098        | 1.236        | 1.298         | 1.148        | 1.121        | <u>1.309</u> | 1.176        |
| MPE                         | -0.005       | -0.005       | <u>-0.004</u> | -0.005       | -0.009       | -0.005       | -0.005       |
| FA                          | 0.980        | <u>0.984</u> | <u>0.984</u>  | <u>0.984</u> | 0.982        | 0.983        | <u>0.984</u> |
| Outputs for Valle de Arán   |              |              |               |              |              |              |              |
| Statistics                  | ANN<br>6-2-1 | ANN<br>6-3-1 | ANN<br>6-4-1  | ANN<br>6-5-1 | ANN<br>6-6-1 | ANN<br>6-7-1 | ANN<br>6-8-1 |
| RMSE (°C)                   | 0.53         | 0.46         | 0.46          | 0.50         | 0.44         | <u>0.42</u>  | 0.46         |
| R <sup>2</sup>              | 0.993        | 0.995        | 0.995         | 0.994        | 0.995        | <u>0.996</u> | 0.995        |
| DW                          | 0.846        | <u>1.024</u> | 0.923         | 0.799        | 0.876        | 0.864        | 0.960        |

|                                        |                      |                      |                      |                      |                      |                      |                      |
|----------------------------------------|----------------------|----------------------|----------------------|----------------------|----------------------|----------------------|----------------------|
| MPE                                    | -0.001               | -0.004               | -0.002               | -0.002               | 0.001                | -0.001               | <u>0.000</u>         |
| FA                                     | 0.983                | 0.986                | 0.986                | 0.985                | 0.986                | <u>0.987</u>         | 0.986                |
| <b>Outputs for Los Santos-Pilarica</b> |                      |                      |                      |                      |                      |                      |                      |
| <b>Statistics</b>                      | <b>ANN<br/>6-2-1</b> | <b>ANN<br/>6-3-1</b> | <b>ANN<br/>6-4-1</b> | <b>ANN<br/>6-5-1</b> | <b>ANN<br/>6-6-1</b> | <b>ANN<br/>6-7-1</b> | <b>ANN<br/>6-8-1</b> |
| RMSE (°C)                              | 0.77                 | 0.73                 | 0.72                 | <u>0.60</u>          | 0.61                 | 0.62                 | 0.60                 |
| R <sup>2</sup>                         | 0.986                | 0.988                | 0.988                | <u>0.992</u>         | 0.991                | 0.991                | <u>0.992</u>         |
| DW                                     | 0.773                | 0.768                | <u>0.877</u>         | 0.591                | 0.859                | 0.837                | 0.653                |
| MPE                                    | 0.005                | 0.002                | 0.002                | 0.001                | 0.002                | 0.001                | <u>0.000</u>         |
| FA                                     | 0.975                | 0.977                | 0.978                | <u>0.981</u>         | 0.980                | <u>0.981</u>         | <u>0.981</u>         |
| <b>Outputs for Parque Alameda</b>      |                      |                      |                      |                      |                      |                      |                      |
| <b>Statistics</b>                      | <b>ANN<br/>6-2-1</b> | <b>ANN<br/>6-3-1</b> | <b>ANN<br/>6-4-1</b> | <b>ANN<br/>6-5-1</b> | <b>ANN<br/>6-6-1</b> | <b>ANN<br/>6-7-1</b> | <b>ANN<br/>6-8-1</b> |
| RMSE (°C)                              | 0.69                 | 0.61                 | 0.63                 | 0.64                 | 0.63                 | 0.63                 | <u>0.61</u>          |
| R <sup>2</sup>                         | 0.989                | <u>0.991</u>         | <u>0.991</u>         | 0.990                | <u>0.991</u>         | 0.990                | <u>0.991</u>         |
| DW                                     | 1.008                | 1.034                | 1.159                | <u>1.277</u>         | 1.021                | 1.139                | 1.120                |
| MPE                                    | 0.002                | -0.003               | 0.002                | <u>-0.001</u>        | -0.002               | -0.004               | -0.002               |
| FA                                     | 0.981                | <u>0.984</u>         | 0.983                | <u>0.984</u>         | 0.982                | <u>0.984</u>         | <u>0.984</u>         |
| <b>Outputs for Campo Grande</b>        |                      |                      |                      |                      |                      |                      |                      |
| <b>Statistics</b>                      | <b>ANN<br/>6-2-1</b> | <b>ANN<br/>6-3-1</b> | <b>ANN<br/>6-4-1</b> | <b>ANN<br/>6-5-1</b> | <b>ANN<br/>6-6-1</b> | <b>ANN<br/>6-7-1</b> | <b>ANN<br/>6-8-1</b> |
| RMSE (°C)                              | 1.20                 | 1.20                 | 1.15                 | 1.10                 | 1.14                 | 1.07                 | <u>0.96</u>          |
| R <sup>2</sup>                         | 0.956                | 0.956                | 0.960                | 0.963                | 0.960                | 0.965                | <u>0.972</u>         |
| DW                                     | 0.369                | 0.317                | 0.242                | 0.306                | 0.268                | 0.319                | <u>0.615</u>         |
| MPE                                    | 0.021                | 0.016                | 0.016                | 0.014                | 0.015                | 0.013                | <u>0.010</u>         |
| FA                                     | 0.961                | 0.965                | 0.968                | 0.969                | 0.969                | 0.967                | <u>0.972</u>         |

Architecture of the model based on the number of neurons in each layer (Input-Hidden-Output). The best architectures (results) obtained for each ANN model with their respective statistical variables of interest are shown / Underlining identifies the best result found.

**Table S2.** Prediction models for average hourly temperatures (°C) in urban gardens and forested urban park in Valladolid (Spain), according to the different ANNs architectures (X-Y-Z)=(7-Y-1), changing the number of neurons in the hidden layers Y=(2, 3,...,8). Where the inputs are X=[Ta(t) Puente Poniente, Ta(t) Plaza San Miguel, Ta(t) Catedral, Ta(t) Don Sancho, Ta(t) Dos de Mayo, Day of year (J=1, 2,..., 365), Hour of day (t=0, 1,..., 23)], and the output is Z=[Ta(t) Jardín Botánico], Z=[Ta(t) Valle de

Arán], Z=[Ta(t) Los Santos-Pilarica], Z=[Ta(t) Parque Alameda], and Z=[Ta(t) Campo Grande] in each case. Adjustment of statistical values.

| Outputs for Jardín Botánico     |              |              |              |              |               |               |              |
|---------------------------------|--------------|--------------|--------------|--------------|---------------|---------------|--------------|
| Statistics                      | ANN<br>7-2-1 | ANN<br>7-3-1 | ANN<br>7-4-1 | ANN<br>7-5-1 | ANN<br>7-6-1  | ANN<br>7-7-1  | ANN<br>7-8-1 |
| RMSE (°C)                       | 0.76         | 0.77         | 0.69         | 0.80         | <u>0.68</u>   | 1.09          | 1.26         |
| R <sup>2</sup>                  | 0.987        | 0.986        | 0.989        | 0.985        | <u>0.990</u>  | 0.973         | 0.963        |
| DW                              | 0.990        | 0.990        | 1.102        | 1.224        | <u>1.347</u>  | 1.201         | 0.603        |
| MPE                             | 0.002        | -0.010       | -0.014       | -0.008       | -0.004        | <u>-0.001</u> | -0.030       |
| FA                              | 0.977        | 0.976        | <u>0.979</u> | 0.974        | <u>0.979</u>  | 0.967         | 0.958        |
| Outputs for Valle de Arán       |              |              |              |              |               |               |              |
| Statistics                      | ANN<br>7-2-1 | ANN<br>7-3-1 | ANN<br>7-4-1 | ANN<br>7-5-1 | ANN<br>7-6-1  | ANN<br>7-7-1  | ANN<br>7-8-1 |
| RMSE (°C)                       | <u>0.69</u>  | 0.78         | 0.73         | 0.97         | 0.81          | 0.95          | 0.91         |
| R <sup>2</sup>                  | <u>0.989</u> | 0.985        | 0.987        | 0.978        | 0.984         | 0.979         | 0.980        |
| DW                              | 0.545        | 0.418        | 0.284        | 0.400        | <u>0.608</u>  | 0.245         | 0.255        |
| MPE                             | -0.019       | -0.022       | -0.022       | -0.019       | <u>-0.006</u> | -0.028        | -0.018       |
| FA                              | <u>0.977</u> | 0.975        | <u>0.977</u> | 0.965        | 0.975         | 0.970         | 0.971        |
| Outputs for Los Santos Pilarica |              |              |              |              |               |               |              |
| Statistics                      | ANN<br>7-2-1 | ANN<br>7-3-1 | ANN<br>7-4-1 | ANN<br>7-5-1 | ANN<br>7-6-1  | ANN<br>7-7-1  | ANN<br>7-8-1 |
| RMSE (°C)                       | <u>0.80</u>  | 0.93         | 0.85         | 1.05         | 1.02          | 1.03          | 1.21         |
| R <sup>2</sup>                  | <u>0.985</u> | 0.980        | 0.983        | 0.975        | 0.976         | 0.975         | 0.966        |
| DW                              | 0.755        | 0.560        | 0.369        | 0.464        | 0.603         | 0.488         | <u>0.875</u> |
| MPE                             | <u>0.000</u> | -0.003       | -0.002       | -0.015       | 0.022         | -0.027        | <u>0.000</u> |
| FA                              | <u>0.975</u> | 0.969        | 0.972        | 0.966        | 0.968         | 0.963         | 0.957        |
| Outputs for Parque Alameda      |              |              |              |              |               |               |              |
| Statistics                      | ANN<br>7-2-1 | ANN<br>7-3-1 | ANN<br>7-4-1 | ANN<br>7-5-1 | ANN<br>7-6-1  | ANN<br>7-7-1  | ANN<br>7-8-1 |
| RMSE (°C)                       | <u>0.81</u>  | 1.13         | 0.83         | 1.05         | 0.85          | 0.97          | 0.89         |
| R <sup>2</sup>                  | <u>0.984</u> | 0.970        | 0.983        | 0.974        | 0.983         | 0.978         | 0.981        |
| DW                              | <u>0.685</u> | 0.594        | 0.646        | 0.418        | 0.636         | 0.643         | 0.622        |

|     |              |        |              |       |               |       |        |
|-----|--------------|--------|--------------|-------|---------------|-------|--------|
| MPE | -0.018       | -0.020 | <u>0.002</u> | 0.016 | <u>-0.002</u> | 0.014 | -0.014 |
| FA  | <u>0.975</u> | 0.966  | <u>0.975</u> | 0.965 | 0.974         | 0.968 | 0.972  |

#### Outputs for Campo Grande

| Statistics     | ANN<br>7-2-1 | ANN<br>7-3-1 | ANN<br>7-4-1 | ANN<br>7-5-1 | ANN<br>7-6-1  | ANN<br>7-7-1 | ANN<br>7-8-1 |
|----------------|--------------|--------------|--------------|--------------|---------------|--------------|--------------|
| RMSE (°C)      | <u>1.44</u>  | 1.72         | 1.64         | 1.80         | 1.68          | 1.92         | 2.05         |
| R <sup>2</sup> | <u>0.937</u> | 0.910        | 0.918        | 0.901        | 0.914         | 0.888        | 0.872        |
| DW             | 0.415        | 0.210        | 0.334        | 0.243        | <u>0.977</u>  | 0.412        | 0.350        |
| MPE            | -0.029       | -0.033       | 0.015        | -0.039       | <u>-0.006</u> | -0.034       | 0.047        |
| FA             | <u>0.954</u> | 0.937        | 0.944        | 0.937        | <u>0.954</u>  | 0.934        | 0.937        |

Architecture of the model based on the number of neurons in each layer (Input-Hidden-Output). The best architectures (results) obtained for each ANN model with their respective statistical variables of interest are shown / Underlining identifies the best result found.

**Table S3.** Prediction models for average hourly temperatures (°C) in urban gardens and forested urban park in Valladolid (Spain), according to the different ANNs architectures (X-Y-Z)=(6-Y-5), changing the number of neurons in the hidden layers Y=(6, 7,...,14). Where the inputs are X=[Ta(t) Puente Poniente, Ta(t) Plaza San Miguel, Ta(t) Catedral, Ta(t) Don Sancho, Ta(t) Dos de Mayo, Hour of day (t=0, 1,..., 23)], and the outputs are Z=[Ta(t) Jardín Botánico, Ta(t) Valle de Arán, Ta(t) Los Santos-Pilarica, Ta(t) Parque Alameda, Ta(t) Campo Grande]. Adjustment of statistical values..

#### Outputs for Jardín Botánico

| Statistics     | ANN<br>6-6-5 | ANN<br>6-7-5 | ANN<br>6-8-5 | ANN<br>6-9-5 | ANN<br>6-10-5 | ANN<br>6-11-5 | ANN<br>6-12-5 | ANN<br>6-13-5 | ANN<br>6-14-5 |
|----------------|--------------|--------------|--------------|--------------|---------------|---------------|---------------|---------------|---------------|
| RMSE (°C)      | 0.65         | 0.64         | <u>0.61</u>  | 0.67         | 0.62          | 0.63          | 0.62          | 0.62          | 0.64          |
| R <sup>2</sup> | 0.990        | 0.990        | <u>0.991</u> | 0.990        | <u>0.991</u>  | <u>0.991</u>  | <u>0.991</u>  | <u>0.991</u>  | <u>0.991</u>  |
| DW             | 1.067        | 0.987        | 1.065        | 1.040        | 1.048         | <u>1.131</u>  | 1.089         | 1.048         | 1.061         |
| MPE            | -0.008       | -0.009       | -0.008       | -0.009       | <u>-0.007</u> | -0.008        | -0.010        | -0.009        | -0.008        |
| FA             | 0.983        | 0.983        | 0.984        | 0.982        | <u>0.985</u>  | 0.983         | 0.983         | 0.984         | 0.982         |

#### Outputs for Valle de Arán

| Statistics     | ANN<br>6-6-5  | ANN<br>6-7-5 | ANN<br>6-8-5 | ANN<br>6-9-5  | ANN<br>6-10-5 | ANN<br>6-11-5 | ANN<br>6-12-5 | ANN<br>6-13-5 | ANN<br>6-14-5 |
|----------------|---------------|--------------|--------------|---------------|---------------|---------------|---------------|---------------|---------------|
| RMSE (°C)      | 0.48          | 0.48         | <u>0.45</u>  | 0.54          | 0.46          | 0.46          | 0.48          | 0.49          | 0.46          |
| R <sup>2</sup> | 0.994         | <u>0.995</u> | <u>0.995</u> | 0.993         | <u>0.995</u>  | <u>0.995</u>  | <u>0.995</u>  | 0.994         | <u>0.995</u>  |
| DW             | 0.846         | 0.703        | 0.714        | 0.766         | 0.815         | 0.849         | <u>0.857</u>  | 0.806         | 0.816         |
| MPE            | <u>-0.003</u> | -0.005       | -0.004       | <u>-0.003</u> | <u>-0.003</u> | -0.005        | -0.006        | -0.006        | -0.004        |

|                                        |                      |                      |                      |                      |                       |                       |                       |                       |                       |
|----------------------------------------|----------------------|----------------------|----------------------|----------------------|-----------------------|-----------------------|-----------------------|-----------------------|-----------------------|
| FA                                     | 0.985                | 0.986                | <u>0.987</u>         | 0.984                | 0.986                 | 0.986                 | 0.985                 | 0.985                 | 0.986                 |
| <b>Outputs for Los Santos Pilarica</b> |                      |                      |                      |                      |                       |                       |                       |                       |                       |
| <b>Statistics</b>                      | <b>ANN<br/>6-6-5</b> | <b>ANN<br/>6-7-5</b> | <b>ANN<br/>6-8-5</b> | <b>ANN<br/>6-9-5</b> | <b>ANN<br/>6-10-5</b> | <b>ANN<br/>6-11-5</b> | <b>ANN<br/>6-12-5</b> | <b>ANN<br/>6-13-5</b> | <b>ANN<br/>6-14-5</b> |
| RMSE (°C)                              | 0.67                 | 0.66                 | 0.65                 | 0.68                 | 0.67                  | <u>0.64</u>           | 0.64                  | 0.66                  | 0.64                  |
| R <sup>2</sup>                         | 0.990                | 0.990                | 0.990                | 0.989                | 0.989                 | <u>0.991</u>          | 0.990                 | 0.990                 | <u>0.991</u>          |
| DW                                     | 0.681                | 0.812                | 0.681                | 0.760                | 0.809                 | 0.844                 | 0.859                 | <u>0.953</u>          | 0.770                 |
| MPE                                    | 0.002                | -0.001               | -0.001               | 0.003                | 0.003                 | <u>0.000</u>          | <u>0.000</u>          | -0.002                | 0.004                 |
| FA                                     | 0.979                | 0.980                | 0.980                | 0.979                | 0.979                 | <u>0.981</u>          | 0.980                 | 0.980                 | 0.980                 |
| <b>Outputs for Parque Alameda</b>      |                      |                      |                      |                      |                       |                       |                       |                       |                       |
| <b>Statistics</b>                      | <b>ANN<br/>6-6-5</b> | <b>ANN<br/>6-7-5</b> | <b>ANN<br/>6-8-5</b> | <b>ANN<br/>6-9-5</b> | <b>ANN<br/>6-10-5</b> | <b>ANN<br/>6-11-5</b> | <b>ANN<br/>6-12-5</b> | <b>ANN<br/>6-13-5</b> | <b>ANN<br/>6-14-5</b> |
| RMSE (°C)                              | 0.63                 | 0.63                 | 0.60                 | 0.66                 | 0.68                  | 0.63                  | 0.62                  | 0.62                  | <u>0.59</u>           |
| R <sup>2</sup>                         | 0.991                | 0.991                | 0.991                | 0.990                | 0.989                 | 0.991                 | 0.991                 | 0.991                 | <u>0.992</u>          |
| DW                                     | 0.937                | 0.940                | 0.969                | 0.943                | <u>1.127</u>          | 0.975                 | 1.116                 | 0.962                 | 1.090                 |
| MPE                                    | <u>-0.001</u>        | -0.005               | -0.003               | <u>0.001</u>         | <u>0.001</u>          | -0.004                | -0.002                | -0.006                | -0.002                |
| FA                                     | 0.983                | 0.983                | 0.984                | 0.983                | 0.982                 | 0.984                 | 0.983                 | 0.984                 | <u>0.985</u>          |
| <b>Outputs for Campo Grande</b>        |                      |                      |                      |                      |                       |                       |                       |                       |                       |
| <b>Statistics</b>                      | <b>ANN<br/>6-6-5</b> | <b>ANN<br/>6-7-5</b> | <b>ANN<br/>6-8-5</b> | <b>ANN<br/>6-9-5</b> | <b>ANN<br/>6-10-5</b> | <b>ANN<br/>6-11-5</b> | <b>ANN<br/>6-12-5</b> | <b>ANN<br/>6-13-5</b> | <b>ANN<br/>6-14-5</b> |
| RMSE (°C)                              | 1.17                 | 1.13                 | 1.16                 | 1.26                 | 1.11                  | 1.02                  | 1.10                  | 1.04                  | <u>1.00</u>           |
| R <sup>2</sup>                         | 0.958                | 0.961                | 0.959                | 0.951                | 0.962                 | 0.968                 | 0.963                 | 0.967                 | <u>0.969</u>          |
| DW                                     | 0.291                | 0.279                | 0.316                | 0.289                | 0.313                 | 0.507                 | 0.256                 | 0.402                 | <u>0.530</u>          |
| MPE                                    | 0.020                | 0.018                | 0.018                | 0.020                | 0.015                 | 0.012                 | 0.017                 | 0.016                 | <u>0.011</u>          |
| FA                                     | 0.968                | 0.968                | 0.966                | 0.964                | 0.968                 | <u>0.972</u>          | 0.970                 | 0.970                 | 0.971                 |

Architecture of the model based on the number of neurons in each layer (Input-Hidden-Output). The best architectures (results) obtained for each ANN model with their respective statistical variables of interest are shown / Underlining identifies the best result found.

**Table S4.** Prediction models for average hourly temperatures (°C) in urban gardens and forested urban park in Valladolid (Spain), according to the different ANNs architectures (X-Y-Z)=(7-Y-5), changing the number of neurons in the hidden layers Y=(6, 7,...,14). Where the inputs are X=[Ta(t) Puente Poniente, Ta(t) Plaza San Miguel, Ta(t) Catedral, Ta(t) Don Sancho, Ta(t) Dos de Mayo, Day of year (J=1, 2,..., 365), Hour of day (t=0, 1,..., 23)], and the outputs are Z=[Ta(t) Jardín Botánico, Ta(t) Valle

de Arán, Ta(t) Los Santos-Pilarica, Ta(t) Parque Alameda, Ta(t) Campo Grande]. Adjustment of statistical values.

| Outputs for Jardín Botánico     |              |              |              |              |               |               |               |               |               |
|---------------------------------|--------------|--------------|--------------|--------------|---------------|---------------|---------------|---------------|---------------|
| Statistics                      | ANN<br>7-6-5 | ANN<br>7-7-5 | ANN<br>7-8-5 | ANN<br>7-9-5 | ANN<br>7-10-5 | ANN<br>7-11-5 | ANN<br>7-12-5 | ANN<br>7-13-5 | ANN<br>7-14-5 |
| RMSE (°C)                       | 0.75         | 0.87         | 0.92         | 0.87         | <u>0.71</u>   | 1.13          | 0.81          | 1.02          | 1.07          |
| R <sup>2</sup>                  | 0.987        | 0.983        | 0.981        | 0.983        | <u>0.988</u>  | 0.971         | 0.985         | 0.976         | 0.974         |
| DW                              | 0.865        | 0.750        | 1.040        | 0.764        | 0.964         | 0.578         | <u>1.165</u>  | 0.664         | 0.539         |
| MPE                             | -0.012       | 0.002        | 0.007        | -0.013       | <u>-0.005</u> | 0.022         | -0.011        | -0.024        | -0.023        |
| FA                              | 0.978        | 0.976        | 0.970        | 0.975        | <u>0.979</u>  | 0.963         | 0.975         | 0.968         | 0.962         |
| Outputs for Valle de Arán       |              |              |              |              |               |               |               |               |               |
| Statistics                      | ANN<br>7-6-5 | ANN<br>7-7-5 | ANN<br>7-8-5 | ANN<br>7-9-5 | ANN<br>7-10-5 | ANN<br>7-11-5 | ANN<br>7-12-5 | ANN<br>7-13-5 | ANN<br>7-14-5 |
| RMSE (°C)                       | 0.89         | 0.71         | 0.79         | 0.73         | <u>0.62</u>   | 1.55          | 0.79          | 0.94          | 0.68          |
| R <sup>2</sup>                  | 0.981        | 0.988        | 0.985        | 0.987        | <u>0.991</u>  | 0.942         | 0.985         | 0.979         | 0.989         |
| DW                              | 0.304        | 0.578        | <u>0.869</u> | 0.617        | 0.694         | 0.202         | 0.751         | 0.516         | 0.655         |
| MPE                             | -0.027       | 0.007        | -0.008       | -0.012       | <u>-0.006</u> | 0.048         | -0.010        | -0.016        | -0.011        |
| FA                              | 0.971        | 0.981        | 0.978        | 0.977        | <u>0.982</u>  | 0.946         | 0.975         | 0.968         | 0.980         |
| Outputs for Los Santos Pilarica |              |              |              |              |               |               |               |               |               |
| Statistics                      | ANN<br>7-6-5 | ANN<br>7-7-5 | ANN<br>7-8-5 | ANN<br>7-9-5 | ANN<br>7-10-5 | ANN<br>7-11-5 | ANN<br>7-12-5 | ANN<br>7-13-5 | ANN<br>7-14-5 |
| RMSE (°C)                       | 1.12         | 1.03         | 1.04         | <u>0.94</u>  | 1.02          | 2.01          | 1.23          | 1.30          | 1.26          |
| R <sup>2</sup>                  | 0.971        | 0.975        | 0.975        | <u>0.979</u> | 0.976         | 0.906         | 0.965         | 0.961         | 0.963         |
| DW                              | 0.371        | 0.371        | 0.589        | <u>0.635</u> | 0.589         | 0.159         | 0.436         | 0.557         | 0.397         |
| MPE                             | -0.026       | 0.020        | 0.006        | 0.002        | <u>0.000</u>  | 0.067         | 0.028         | 0.009         | 0.017         |
| FA                              | 0.964        | <u>0.971</u> | 0.967        | 0.970        | 0.968         | 0.929         | 0.956         | 0.954         | 0.955         |
| Outputs for Parque Alameda      |              |              |              |              |               |               |               |               |               |
| Statistics                      | ANN<br>7-6-5 | ANN<br>7-7-5 | ANN<br>7-8-5 | ANN<br>7-9-5 | ANN<br>7-10-5 | ANN<br>7-11-5 | ANN<br>7-12-5 | ANN<br>7-13-5 | ANN<br>7-14-5 |
| RMSE (°C)                       | 1.30         | 0.96         | 0.93         | 0.91         | <u>0.80</u>   | 2.36          | 0.90          | 1.11          | 0.97          |
| R <sup>2</sup>                  | 0.960        | 0.978        | 0.979        | 0.980        | <u>0.985</u>  | 0.867         | 0.981         | 0.971         | 0.978         |

|     |        |        |        |        |               |       |              |        |        |
|-----|--------|--------|--------|--------|---------------|-------|--------------|--------|--------|
| DW  | 0.302  | 0.592  | 0.750  | 0.529  | 0.794         | 0.164 | <u>0.842</u> | 0.517  | 0.575  |
| MPE | -0.041 | -0.002 | -0.004 | -0.021 | <u>-0.001</u> | 0.074 | -0.007       | -0.026 | -0.016 |
| FA  | 0.956  | 0.971  | 0.972  | 0.971  | <u>0.979</u>  | 0.922 | 0.972        | 0.967  | 0.971  |

**Outputs for Campo Grande**

| Statistics     | ANN<br>7-6-5 | ANN<br>7-7-5  | ANN<br>7-8-5  | ANN<br>7-9-5 | ANN<br>7-10-5 | ANN<br>7-11-5 | ANN<br>7-12-5 | ANN<br>7-13-5 | ANN<br>7-14-5 |
|----------------|--------------|---------------|---------------|--------------|---------------|---------------|---------------|---------------|---------------|
| RMSE (°C)      | 1.34         | 1.58          | <u>1.14</u>   | 1.73         | 1.75          | 4.58          | 2.59          | 1.64          | 3.72          |
| R <sup>2</sup> | 0.945        | 0.923         | <u>0.960</u>  | 0.908        | 0.906         | 0.281         | 0.795         | 0.918         | 0.578         |
| DW             | 0.945        | 0.923         | <u>0.960</u>  | 0.908        | 0.906         | 0.281         | 0.795         | 0.918         | 0.578         |
| MPE            | 0.408        | 0.407         | 0.704         | 0.255        | 0.387         | 0.082         | <u>1.157</u>  | 0.311         | 0.191         |
| FA             | -0.017       | <u>-0.003</u> | <u>-0.003</u> | -0.048       | <u>-0.003</u> | -0.170        | 0.009         | -0.031        | -0.050        |

Architecture of the model based on the number of neurons in each layer (Input-Hidden-Output). The best architectures (results) obtained for each ANN model with their respective statistical variables of interest are shown / Underlining identifies the best result found.

**Table S5.** Prediction models for average hourly temperatures (°C) in urban gardens and forested urban park in Valladolid (Spain), according to the different ANNs architectures (X-Y-Z)=(4-Y-1), changing the number of neurons in the hidden layers Y=(1, 2,...,7). Where the inputs are X=[Ta(t) Don Sancho, Ta(t) Dos de Mayo, Day of year (J=1, 2,..., 365), Hour of day (t=0, 1,..., 23)], and the output is Z=[Ta(t) Campo Grande]. Adjustment of statistical values.

**“Don Sancho + Dos de Mayo vs Campo Grande”. Outputs for Campo Grande**

| Statistics     | ANN<br>4-1-1 | ANN<br>4-2-1 | ANN<br>4-3-1 | ANN<br>4-4-1 | ANN<br>4-5-1 | ANN<br>4-6-1 | ANN<br>4-7-1 |
|----------------|--------------|--------------|--------------|--------------|--------------|--------------|--------------|
| RMSE (°C)      | 1.89         | <u>1.46</u>  | 1.56         | 1.57         | 1.64         | 1.73         | 1.91         |
| R <sup>2</sup> | 0.891        | <u>0.935</u> | 0.926        | 0.925        | 0.918        | 0.908        | 0.889        |
| DW             | 0.236        | 0.246        | 0.227        | 0.259        | 0.263        | <u>0.272</u> | 0.226        |
| MPE            | -0.049       | <u>0.006</u> | -0.028       | -0.039       | -0.031       | -0.045       | -0.055       |
| FA             | 0.939        | <u>0.951</u> | 0.945        | 0.945        | 0.943        | 0.933        | 0.928        |

Architecture of the model based on the number of neurons in each layer (Input-Hidden-Output). The best architectures (results) obtained for each ANN model with their respective statistical variables of interest are shown / Underlining identifies the best result found.

**Table S6.** Prediction models for average hourly temperatures (°C) in urban gardens and forested urban park in Valladolid (Spain), according to the different ANNs architectures (X-Y-Z)=(3-Y-1), changing the number of neurons in the hidden layers Y=(1, 2,...,7). Where the inputs are X=[Ta(t) Dos de Mayo, Day of year (J=1, 2,..., 365), Hour of day (t=0, 1,..., 23)], and the output is Z=[Ta(t) Campo Grande]. Adjustment of statistical values.

**“Puente Poniente vs Jardín Botánico”. Outputs for Jardín Botánico**





|                | 2-1-1 | 2-2-1        | 2-3-1 | 2-4-1 | 2-5-1 | 2-6-1 | 2-7-1        | 2-8-1 |
|----------------|-------|--------------|-------|-------|-------|-------|--------------|-------|
| RMSE (°C)      | 2.10  | 1.41         | 1.39  | 1.28  | 1.40  | 1.20  | <u>1.11</u>  | 1.16  |
| R <sup>2</sup> | 0.865 | 0.939        | 0.941 | 0.950 | 0.940 | 0.956 | <u>0.962</u> | 0.959 |
| DW             | 0.351 | <u>0.527</u> | 0.551 | 0.333 | 0.514 | 0.315 | 0.414        | 0.352 |
| MPE            | 0.034 | 0.026        | 0.020 | 0.013 | 0.027 | 0.016 | <u>0.008</u> | 0.013 |
| FA             | 0.930 | 0.953        | 0.955 | 0.961 | 0.953 | 0.963 | <u>0.966</u> | 0.964 |

Architecture of the model based on the number of neurons in each layer (Input-Hidden-Output). The best architectures (results) obtained for each ANN model with their respective statistical variables of interest are shown / Underlining identifies the best result found.
